# Supplementary material
Source: HighWire-hosted journal article supplement (https://erj.ersjournals.com/content/56/2/2002149)
Supplement: inline-supplementary-material-1 [file inline-supplementary-material-1.pdf]

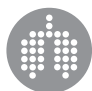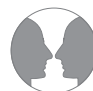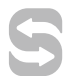

SHAREABLE PDF

# Diagnosing adrenal insufficiency using ACTH stimulation test

Alexandra M. Nanzer <sup>1,2</sup>, Grainne D'Ancona<sup>1</sup>, Philip A. Kelly<sup>3</sup> and David J. Jackson <sup>1,2</sup>

**Affiliations:** <sup>1</sup>Guy's and St Thomas' NHS Foundation Trust, Thoracic Medicine, Guy's Severe Asthma Service, London, UK. <sup>2</sup>King's College London, London, UK. <sup>3</sup>King's College Hospital NHS Foundation Trust, London, UK.

**Correspondence:** Alexandra M. Nanzer, Guy's and St Thomas' NHS Foundation Trust, Thoracic Medicine, Guy's Severe Asthma Service, Guy's Hospital, Great Maze Pond, London SE1 9RT, UK. E-mail: alexandra.nanzerkelly@gstt.nhs.uk

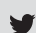

@ERSpublications

**When to wean? Steroid stewardship in the biologic era**  
<https://bit.ly/3cOL94R>

**Cite this article as:** Nanzer AM, D'Ancona G, Kelly PA, *et al.* Diagnosing adrenal insufficiency using ACTH stimulation test. *Eur Respir J* 2020; 56: 2002149 [<https://doi.org/10.1183/13993003.02149-2020>].

This single-page version can be shared freely online.

## From the authors:

We acknowledge B. Lipworth's work and significant contribution in highlighting the metabolic consequences of steroid therapy in airways disease over the past decades. In their letter he and colleagues refer to a post-synthetic adrenocorticotrophic hormone (ACTH, Synacthen) cortisol level of 500 nmol·L<sup>-1</sup> as the accepted cut-off to diagnose impaired adrenal function. These diagnostic values were derived using older cortisol assays; however, the cortisol levels in our report relate specifically to the newer Roche Elecsys II Cortisol assay used at our centre that gives, on average, 25% lower serum cortisol values, with a cut-off of  $\geq 420$  nmol·L<sup>-1</sup> for the 250 µg intramuscular short Synacthen test (SST) at 30 or 60 min [1]. The median cortisol level after SST was 490 nmol·L<sup>-1</sup> (interquartile range (IQR) 453–620 nmol·L<sup>-1</sup>) in patients who passed the SST; in those who failed the SST the cortisol level after SST was 262 nmol·L<sup>-1</sup> (IQR 130–310 nmol·L<sup>-1</sup>).
